# Supplementary material for: Magma Dynamics and Cooling in Sub-volcanic intrusions: Insights on eruption potential from Finite Element Modeling
Source: Research Square preprint supplement (doi:10.21203/rs.3.rs-8173420/v1), 2025-12-04
Supplement: Supplementary file 1 [file 0677178d5c4d59100febe2d6.pdf]

# **Magma Dynamics and Cooling in Sub-volcanic intrusions: Insights on eruption potential from Finite Element Modeling**

Erika Ronchin<sup>1,2</sup>, Adelina Geyer Traver<sup>3</sup>, Steffi Burchardt<sup>4,5</sup>, Christoph Hieronymus<sup>4</sup>, Tobias Mattsson<sup>4</sup>

<sup>1</sup> Department of Earth Sciences, Sapienza University of Rome, Rome, Italy.

<sup>2</sup> CREA Research Centre for Viticulture and Enology, Gorizia, Italy

<sup>3</sup> GEO3BCN, CSIC, Lluís Solé i Sabarís s/n, 08028 Barcelona

<sup>4</sup> Department of Earth Sciences, Uppsala University, Uppsala, Sweden

<sup>5</sup> Centre for Natural Hazards and Disaster Science, Sweden

Corresponding author: [steffi.burchardt@geo.uu.se](mailto:steffi.burchardt@geo.uu.se)

## **SUPPLEMENTARY INFORMATION**

### **Figure S1**

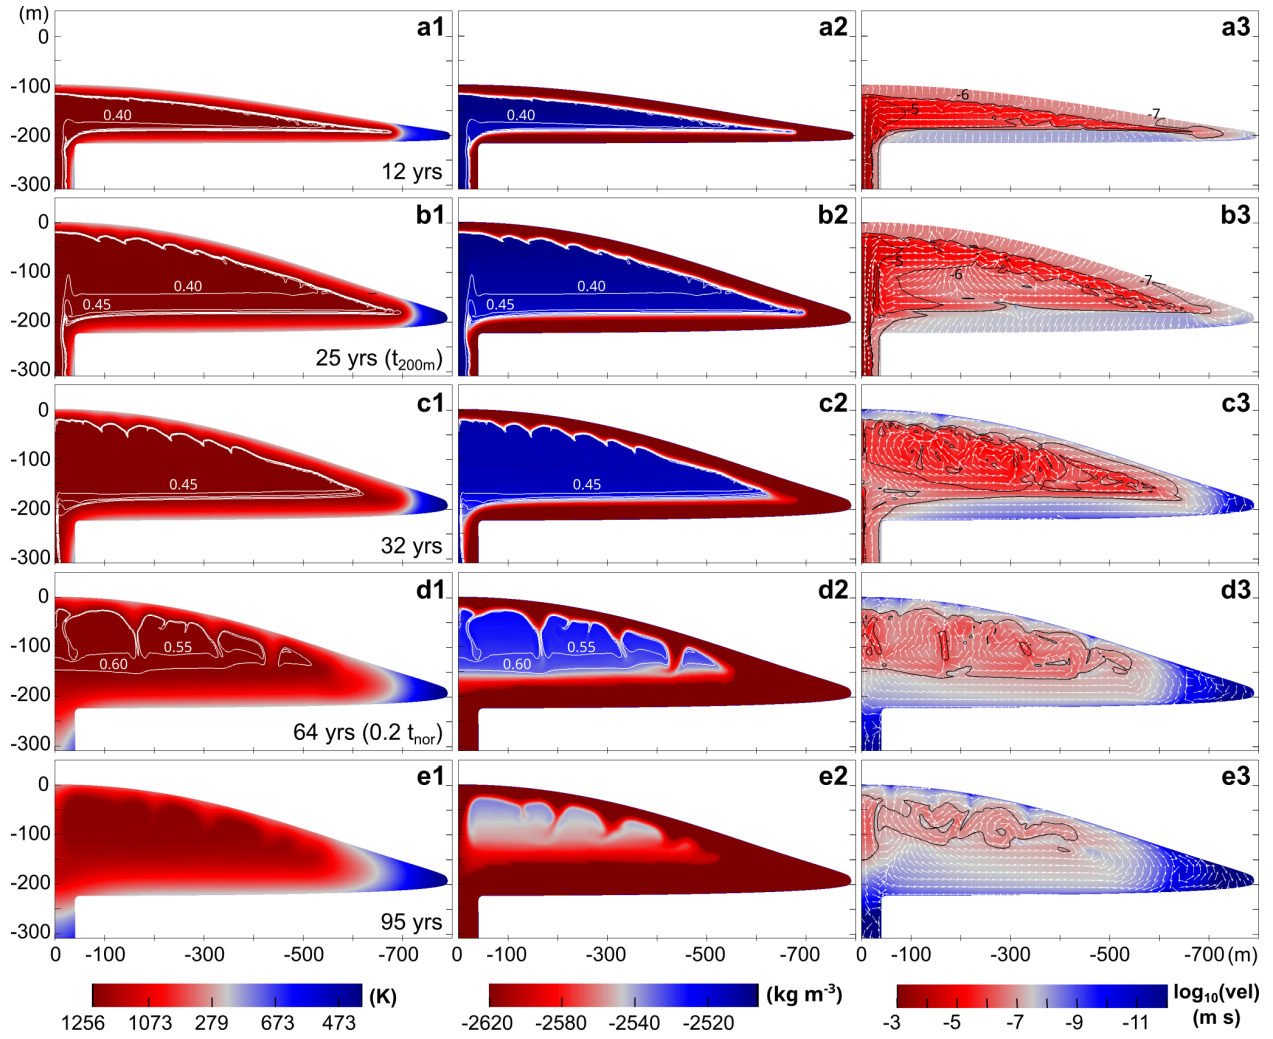

**Fig. S1 Magma flow physical properties evolution during sub-volcanic intrusion growing and post-growth cooling phase, exemplified for the model *intruded\_25years*.** Distribution of temperature (first column), density (second column), and velocity (third column) of magma within the modelled growing sub-volcanic intrusion at representative times: 12 yrs (a), 25 yrs (b), 32 yrs (c), 64 yrs (d), and 95 yrs (e). The white contours and numbers represent the amount of solid fraction ( $\phi$ ).
