# Supplementary material for: Magma Dynamics and Cooling in Sub-volcanic intrusions: Insights on eruption potential from Finite Element Modeling
Source: Research Square preprint supplement (doi:10.21203/rs.3.rs-8173420/v1), 2025-12-04
Supplement: Supplementary file 1 [file 9720164597959566f4537ea3.xlsx]

## Sheet: OUTPUT MELTS_55bars_nowater
T(K)	T (C)	P (kbars)	liquid_dens	solid_dens	melt fraction	solid fraction	Cp_m	CP_s	liq mass (gm)	liq rho (gm/cc)	wt% SiO2	wt% TiO2	wt% Al2O3	wt% Fe2O3	wt% FeO	wt% MnO	wt% MgO	wt% CaO	wt% Na2O	wt% K2O	wt% P2O5	wt% H2O	liq G (kJ)	liq H (kJ)	liq S (J/K)	liq V (cc)	liq Cp (J/K)	liq vis (log 10 poise)	liq_visc	liq_vis(log Pas)	sol mass (gm)	sol rho (gm/cc)	sol G (kJ)	sol H (kJ)	sol S (J/K)	sol V (cc)	sol Cp (J/K)	sys G (kJ)	sys H (kJ)	sys S (J/K)	sys V (cc)	sys Cp (J/K)	sys dVdT (cc/K)	sys dVdP (cc/bar)	sys alpha (1/K)	sys beta (1/bar)	liq dVdT (cc/K)	liq dVdP (cc/bar)	liq alpha (1/K)
1358.31	1085.16	0.055	2403.5	2571.9	1	0	1.33	1.23	99.5	2.4035	69.8484	0.7034	14.3346	0.7836	3.4179	0.1105	0.5426	2.2328	5.1533	2.7624	0.1105	0	-1640	-1300	254	41.4	132	6.3175	207730	5.3175	0.142	2.5719	-2.42	-1.95	0.344	0.055	0.174	-1640	-1300	254	41.5	133	0.00173	-0.000316	4.17e-05	7.62e-06	0.00173	-0.000316	4.17e-05
1356.31	1083.16	0.055	2403.6	2571.4	0.99	0.01	1.33	1.23	98.8	2.4036	69.9123	0.7088	14.2588	0.79	3.4441	0.1114	0.5468	2.2073	5.13	2.7791	0.1114	0	-1630	-1290	252	41.1	131	6.336	216770	5.336	0.907	2.5714	-15.5	-12.5	2.2	0.353	1.11	-1640	-1300	254	41.4	132	0.00172	-0.000314	4.15e-05	7.58e-06	0.00171	-0.000314	4.16e-05
1354.31	1081.16	0.055	2403.7	2570.9	0.98	0.02	1.33	1.23	98	2.4037	69.9755	0.7143	14.1833	0.7964	3.4704	0.1122	0.551	2.1826	5.1061	2.7957	0.1122	0	-1610	-1280	250	40.8	130	6.3545	226204	5.3545	1.67	2.5709	-28.5	-23	4.04	0.648	2.05	-1640	-1300	254	41.4	132	0.00171	-0.000313	4.14e-05	7.55e-06	0.0017	-0.000311	4.16e-05
1352.31	1079.16	0.055	2403.9	2570.4	0.98	0.02	1.33	1.23	97.2	2.4039	70.038	0.7198	14.1081	0.8029	3.497	0.1131	0.5553	2.1587	5.0817	2.8123	0.1131	0	-1600	-1270	248	40.5	129	6.3729	235993	5.3729	2.42	2.5704	-41.3	-33.4	5.87	0.941	2.97	-1640	-1300	253	41.4	132	0.00171	-0.000311	4.13e-05	7.51e-06	0.00168	-0.000309	4.16e-05
1350.31	1077.16	0.055	2404.1	2570	0.97	0.03	1.33	1.23	96.5	2.4041	70.0997	0.7254	14.0333	0.8094	3.5237	0.114	0.5596	2.1355	5.0567	2.8288	0.114	0	-1590	-1260	245	40.1	128	6.3913	246207	5.3913	3.16	2.57	-54.1	-43.7	7.67	1.23	3.88	-1640	-1300	253	41.4	132	0.0017	-0.000309	4.11e-05	7.48e-06	0.00167	-0.000307	4.15e-05
1348.31	1075.16	0.055	2404.2	2569.5	0.96	0.04	1.33	1.23	95.8	2.4042	70.1607	0.731	13.9587	0.816	3.5506	0.1149	0.5639	2.113	5.0311	2.8452	0.1149	0	-1570	-1250	243	39.8	127	6.4096	256803	5.4096	3.9	2.5695	-66.7	-53.9	9.45	1.52	4.79	-1640	-1300	253	41.3	132	0.0017	-0.000308	4.1e-05	7.44e-06	0.00165	-0.000305	4.15e-05
1346.31	1073.16	0.055	2404.4	2569.1	0.95	0.05	1.33	1.23	95	2.4044	70.2211	0.7366	13.8845	0.8226	3.5776	0.1158	0.5682	2.0913	5.005	2.8615	0.1158	0	-1560	-1240	241	39.5	126	6.4278	267793	5.4278	4.63	2.5691	-79.1	-64	11.2	1.8	5.68	-1640	-1300	252	41.3	132	0.00169	-0.000306	4.09e-05	7.41e-06	0.00164	-0.000303	4.14e-05
1344.31	1071.16	0.055	2404.6	2568.7	0.95	0.05	1.33	1.23	94.3	2.4046	70.2807	0.7423	13.8106	0.8292	3.6047	0.1166	0.5726	2.0703	4.9785	2.8778	0.1166	0	-1550	-1230	239	39.2	125	6.446	279254	5.446	5.36	2.5687	-91.4	-74	13	2.08	6.57	-1640	-1300	252	41.3	132	0.00168	-0.000305	4.08e-05	7.37e-06	0.00162	-0.000301	4.14e-05
1342.31	1069.16	0.055	2404.8	2568.3	0.94	0.06	1.33	1.23	93.6	2.4048	70.3397	0.7479	13.737	0.8359	3.632	0.1175	0.577	2.05	4.9515	2.8939	0.1175	0	-1540	-1220	237	38.9	124	6.4641	291139	5.4641	6.07	2.5683	-104	-83.9	14.7	2.36	7.45	-1640	-1300	252	41.3	131	0.00168	-0.000303	4.06e-05	7.34e-06	0.00161	-0.000299	4.14e-05
1340.31	1067.16	0.055	2405	2567.9	0.93	0.07	1.32	1.23	92.9	2.405	70.398	0.7536	13.6638	0.8426	3.6594	0.1184	0.5814	2.0303	4.924	2.9099	0.1184	0	-1520	-1210	235	38.6	123	6.4822	303529	5.4822	6.78	2.5679	-116	-93.7	16.4	2.64	8.32	-1640	-1300	251	41.3	131	0.00167	-0.000301	4.05e-05	7.3e-06	0.0016	-0.000297	4.13e-05
1338.31	1065.16	0.055	2405.2	2567.6	0.92	0.08	1.32	1.23	92.2	2.4052	70.4556	0.7594	13.591	0.8494	3.6869	0.1193	0.5858	2.0114	4.8962	2.9258	0.1193	0	-1510	-1200	233	38.3	122	6.5003	316446	5.5003	7.48	2.5676	-128	-103	18.1	2.91	9.17	-1640	-1300	251	41.2	131	0.00167	-0.0003	4.04e-05	7.27e-06	0.00158	-0.000295	4.13e-05
1336.31	1063.16	0.055	2405.5	2567.2	0.92	0.08	1.32	1.23	91.5	2.4055	70.5126	0.7651	13.5184	0.8561	3.7145	0.1202	0.5902	1.993	4.8679	2.9415	0.1202	0	-1500	-1190	231	38	121	6.5183	329837	5.5183	8.17	2.5672	-139	-113	19.7	3.18	10	-1640	-1300	251	41.2	131	0.00166	-0.000298	4.03e-05	7.24e-06	0.00157	-0.000293	4.12e-05
1334.31	1061.16	0.055	2405.7	2566.8	0.91	0.09	1.32	1.23	90.8	2.4057	70.569	0.7709	13.4463	0.8629	3.7422	0.1211	0.5947	1.9753	4.8393	2.9571	0.1211	0	-1490	-1180	229	37.7	120	6.5362	343716	5.5362	8.86	2.5668	-151	-122	21.4	3.45	10.9	-1640	-1300	250	41.2	131	0.00165	-0.000297	4.02e-05	7.2e-06	0.00155	-0.000291	4.12e-05
1332.31	1059.16	0.055	2406	2566.5	0.9	0.1	1.32	1.23	90.1	2.406	70.6248	0.7767	13.3744	0.8697	3.77	0.122	0.5991	1.9582	4.8103	2.9726	0.122	0	-1480	-1170	227	37.5	119	6.5541	358179	5.5541	9.53	2.5665	-162	-132	23	3.71	11.7	-1640	-1300	250	41.2	131	0.00165	-0.000295	4e-05	7.17e-06	0.00154	-0.000289	4.11e-05
1330.31	1057.16	0.055	2406.2	2566.2	0.9	0.1	1.32	1.23	89.5	2.4062	70.6799	0.7825	13.303	0.8766	3.7978	0.123	0.6036	1.9417	4.7811	2.988	0.123	0	-1460	-1160	225	37.2	118	6.572	373250	5.572	10.2	2.5662	-174	-141	24.6	3.98	12.5	-1640	-1300	250	41.2	131	0.00164	-0.000294	3.99e-05	7.14e-06	0.00153	-0.000287	4.11e-05
1328.31	1055.16	0.055	2406.5	2565.9	0.89	0.11	1.32	1.23	88.8	2.4065	70.7344	0.7883	13.2319	0.8835	3.8257	0.1239	0.6081	1.9257	4.7515	3.0031	0.1239	0	-1450	-1150	223	36.9	117	6.5898	388866	5.5898	10.9	2.5659	-185	-150	26.2	4.23	13.3	-1640	-1310	249	41.1	131	0.00164	-0.000292	3.98e-05	7.11e-06	0.00152	-0.000285	4.11e-05
1326.31	1053.16	0.055	2406.8	2565.5	0.88	0.12	1.32	1.22	88.1	2.4068	70.7884	0.7941	13.1612	0.8904	3.8537	0.1248	0.6126	1.9103	4.7216	3.0182	0.1248	0	-1440	-1150	221	36.6	116	6.6076	405135	5.6076	11.5	2.5655	-196	-159	27.7	4.49	14.1	-1640	-1310	249	41.1	131	0.00163	-0.000291	3.97e-05	7.07e-06	0.0015	-0.000283	4.1e-05
1324.31	1051.16	0.055	2407.1	2565.2	0.88	0.12	1.32	1.22	87.5	2.4071	70.8418	0.8	13.0908	0.8973	3.8817	0.1257	0.6171	1.8955	4.6915	3.033	0.1257	0	-1430	-1140	220	36.4	116	6.6254	422085	5.6254	12.2	2.5652	-207	-168	29.2	4.74	14.9	-1640	-1310	249	41.1	130	0.00163	-0.000289	3.96e-05	7.04e-06	0.00149	-0.000281	4.1e-05
1322.31	1049.16	0.055	2407.3	2565	0.87	0.13	1.32	1.22	86.9	2.4073	70.8946	0.8058	13.0208	0.9042	3.9097	0.1266	0.6216	1.8811	4.6611	3.0477	0.1266	0	-1420	-1130	218	36.1	115	6.6431	439643	5.6431	12.8	2.565	-218	-177	30.7	4.99	15.7	-1640	-1310	248	41.1	130	0.00162	-0.000288	3.95e-05	7.01e-06	0.00148	-0.000279	4.09e-05
1320.31	1047.16	0.055	2407.6	2564.7	0.87	0.13	1.32	1.22	86.2	2.4076	70.9469	0.8117	12.9512	0.9112	3.9378	0.1275	0.6261	1.8673	4.6306	3.0622	0.1275	0	-1410	-1120	216	35.8	114	6.6608	457931	5.6608	13.4	2.5647	-228	-186	32.2	5.23	16.4	-1630	-1310	248	41.1	130	0.00162	-0.000287	3.94e-05	6.98e-06	0.00146	-0.000277	4.09e-05
1318.31	1045.16	0.055	2407.9	2564.4	0.86	0.14	1.32	1.22	85.6	2.4079	70.9986	0.8175	12.8819	0.9181	3.9659	0.1285	0.6307	1.854	4.5998	3.0766	0.1285	0	-1400	-1110	214	35.6	113	6.6785	476980	5.6785	14	2.5644	-239	-194	33.7	5.47	17.2	-1630	-1310	248	41	130	0.00161	-0.000285	3.93e-05	6.95e-06	0.00145	-0.000276	4.08e-05
1316.31	1043.16	0.055	2408.3	2564.2	0.85	0.15	1.32	1.22	85	2.4083	71.0497	0.8234	12.8131	0.9251	3.9939	0.1294	0.6352	1.8411	4.5689	3.0907	0.1294	0	-1380	-1100	212	35.3	112	6.6961	496707	5.6961	14.6	2.5642	-249	-203	35.1	5.71	17.9	-1630	-1310	248	41	130	0.00161	-0.000284	3.92e-05	6.92e-06	0.00144	-0.000274	4.08e-05
1314.31	1041.16	0.055	2408.6	2563.9	0.85	0.15	1.32	1.22	84.4	2.4086	71.1004	0.8293	12.7446	0.9321	4.022	0.1303	0.6397	1.8287	4.5378	3.1047	0.1303	0	-1370	-1100	211	35	111	6.7137	517249	5.7137	15.2	2.5639	-259	-211	36.5	5.95	18.7	-1630	-1310	247	41	130	0.0016	-0.000282	3.9e-05	6.89e-06	0.00143	-0.000272	4.08e-05
1312.31	1039.16	0.055	2408.9	2563.7	0.84	0.16	1.32	1.22	83.8	2.4089	71.1505	0.8351	12.6765	0.9391	4.0501	0.1312	0.6442	1.8168	4.5066	3.1185	0.1312	0	-1360	-1090	209	34.8	110	6.7313	538642	5.7313	15.8	2.5637	-269	-219	37.9	6.18	19.4	-1630	-1310	247	41	130	0.0016	-0.000281	3.89e-05	6.86e-06	0.00142	-0.00027	4.07e-05
1310.31	1037.16	0.055	2409.2	2563.4	0.84	0.16	1.32	1.22	83.2	2.4092	71.2002	0.841	12.6088	0.9462	4.0782	0.1322	0.6488	1.8053	4.4753	3.1321	0.1322	0	-1350	-1080	207	34.5	110	6.7489	560919	5.7489	16.4	2.5634	-279	-227	39.3	6.41	20.1	-1630	-1310	247	41	130	0.00159	-0.00028	3.88e-05	6.83e-06	0.00141	-0.000269	4.07e-05
1308.31	1035.16	0.055	2409.6	2563.2	0.83	0.17	1.32	1.22	82.7	2.4096	71.2493	0.8468	12.5415	0.9532	4.1062	0.1331	0.6533	1.7942	4.4439	3.1455	0.1331	0	-1340	-1070	206	34.3	109	6.7664	583983	5.7664	17	2.5632	-289	-235	40.7	6.63	20.8	-1630	-1310	246	40.9	130	0.00159	-0.000279	3.87e-05	6.8e-06	0.00139	-0.000267	4.06e-05
1306.31	1033.16	0.055	2409.9	2563	0.82	0.18	1.32	1.22	82.1	2.4099	71.2979	0.8527	12.4746	0.9603	4.1342	0.134	0.6578	1.7835	4.4124	3.1587	0.134	0	-1330	-1070	204	34.1	108	6.7839	607995	5.7839	17.6	2.563	-298	-243	42	6.86	21.5	-1630	-1310	246	40.9	129	0.00158	-0.000277	3.86e-05	6.77e-06	0.00138	-0.000265	4.06e-05
1304.31	1031.16	0.055	2410.2	2562.8	0.82	0.18	1.31	1.22	81.5	2.4102	71.3461	0.8586	12.408	0.9673	4.1622	0.1349	0.6623	1.7732	4.3808	3.1717	0.1349	0	-1320	-1060	202	33.8	107	6.8014	632995	5.8014	18.1	2.5628	-308	-251	43.3	7.07	22.2	-1630	-1310	246	40.9	129	0.00158	-0.000276	3.85e-05	6.75e-06	0.00137	-0.000264	4.05e-05
1302.31	1029.16	0.055	2410.6	2562.6	0.81	0.19	1.31	1.22	81	2.4106	71.3938	0.8644	12.3419	0.9744	4.1901	0.1358	0.6668	1.7632	4.3492	3.1845	0.1358	0	-1310	-1050	201	33.6	106	6.8189	659022	5.8189	18.7	2.5626	-317	-259	44.6	7.29	22.8	-1630	-1310	245	40.9	129	0.00157	-0.000275	3.85e-05	6.72e-06	0.00136	-0.000262	4.05e-05
1300.31	1027.16	0.055	2410.9	2562.4	0.81	0.19	1.31	1.22	80.4	2.4109	71.441	0.8703	12.2761	0.9815	4.218	0.1368	0.6713	1.7537	4.3175	3.1971	0.1368	0	-1300	-1040	199	33.4	106	6.8363	685962	5.8363	19.2	2.5624	-326	-266	45.8	7.5	23.5	-1630	-1310	245	40.9	129	0.00157	-0.000273	3.84e-05	6.69e-06	0.00135	-0.00026	4.05e-05
1298.31	1025.16	0.055	2411.3	2562.2	0.8	0.2	1.31	1.22	79.9	2.4113	71.4878	0.8761	12.2107	0.9886	4.2459	0.1377	0.6758	1.7445	4.2858	3.2095	0.1377	0	-1290	-1040	198	33.1	105	6.8538	714167	5.8538	19.8	2.5622	-335	-274	47.1	7.71	24.1	-1630	-1310	245	40.8	129	0.00156	-0.000272	3.83e-05	6.67e-06	0.00134	-0.000259	4.04e-05
1296.31	1023.16	0.055	2411.7	2562.1	0.8	0.2	1.31	1.22	79.4	2.4117	71.5342	0.8819	12.1458	0.9957	4.2736	0.1386	0.6803	1.7356	4.2541	3.2217	0.1386	0	-1280	-1030	196	32.9	104	6.8712	743361	5.8712	20.3	2.5621	-344	-281	48.3	7.92	24.8	-1630	-1310	245	40.8	129	0.00156	-0.000271	3.82e-05	6.64e-06	0.00133	-0.000257	4.04e-05
1294.31	1021.16	0.055	2412	2561.9	0.79	0.21	1.31	1.22	78.9	2.412	71.5801	0.8877	12.0812	1.0028	4.3013	0.1395	0.6848	1.727	4.2224	3.2336	0.1395	0	-1280	-1020	195	32.7	103	6.8887	773927	5.8887	20.8	2.5619	-352	-288	49.5	8.12	25.4	-1630	-1310	244	40.8	129	0.00155	-0.00027	3.81e-05	6.61e-06	0.00132	-0.000256	4.03e-05
1292.31	1019.16	0.055	2412.4	2561.7	0.79	0.21	1.31	1.22	78.3	2.4124	71.6256	0.8935	12.017	1.0099	4.329	0.1404	0.6893	1.7188	4.1907	3.2454	0.1404	0	-1270	-1020	193	32.5	103	6.9061	805564	5.9061	21.3	2.5617	-361	-296	50.7	8.32	26	-1630	-1310	244	40.8	129	0.00155	-0.000269	3.8e-05	6.59e-06	0.00131	-0.000254	4.03e-05
1290.31	1017.16	0.055	2412.8	2561.6	0.78	0.22	1.31	1.22	77.8	2.4128	71.6706	0.8993	11.9532	1.017	4.3565	0.1413	0.6938	1.7109	4.1591	3.257	0.1413	0	-1260	-1010	192	32.3	102	6.9235	838494	5.9235	21.8	2.5616	-369	-303	51.9	8.52	26.6	-1630	-1310	244	40.8	129	0.00155	-0.000268	3.79e-05	6.56e-06	0.0013	-0.000253	4.02e-05
1288.31	1015.16	0.055	2413.1	2561.4	0.78	0.22	1.31	1.23	77.3	2.4131	71.7153	0.9051	11.8898	1.0241	4.384	0.1422	0.6982	1.7032	4.1274	3.2684	0.1422	0	-1250	-1000	190	32	101	6.9409	872770	5.9409	22.3	2.5614	-378	-310	53	8.72	27.5	-1630	-1310	243	40.8	129	0.00155	-0.000266	3.8e-05	6.54e-06	0.00129	-0.000251	4.02e-05
1286.31	1013.16	0.055	2411.6	2570.7	0.76	0.24	1.31	1.23	76.2	2.4116	71.882	0.9182	11.829	1.0163	4.3378	0.1443	0.6381	1.6946	4.0942	3.3011	0.1443	0	-1230	-990	187	31.6	99.8	6.9939	986052	5.9939	23.4	2.5707	-395	-324	55.5	9.12	28.8	-1630	-1310	243	40.7	129	0.00154	-0.000264	3.78e-05	6.49e-06	0.00126	-0.000248	4e-05
1284.31	1011.16	0.055	2411.2	2574	0.76	0.24	1.31	1.23	75.5	2.4112	71.9757	0.9269	11.7673	1.017	4.3338	0.1457	0.6181	1.6873	4.0619	3.3207	0.1457	0	-1220	-980	185	31.3	98.8	7.0257	1.06096e+06	6.0257	24.2	2.574	-407	-334	57.2	9.39	29.7	-1630	-1310	243	40.7	129	0.00153	-0.000263	3.76e-05	6.45e-06	0.00125	-0.000246	3.99e-05
1282.31	1009.16	0.055	2404.1	2594.9	0.74	0.26	1.31	1.22	74.1	2.4041	72.5211	0.8393	11.6876	0.9509	4.0183	0.1485	0.6206	1.6796	4.0207	3.365	0.1485	0	-1200	-965	182	30.8	96.9	7.1402	1.38102e+06	6.1402	25.6	2.5949	-427	-349	60.4	9.86	31.3	-1630	-1310	242	40.7	128	0.0015	-0.00026	3.7e-05	6.39e-06	0.00121	-0.000243	3.92e-05
1280.31	1007.16	0.055	2402.5	2599.9	0.74	0.26	1.31	1.22	73.3	2.4025	72.6953	0.8305	11.6238	0.9391	3.9572	0.1501	0.6058	1.6731	3.9868	3.3882	0.1501	0	-1190	-956	180	30.5	95.8	7.1874	1.53957e+06	6.1874	26.4	2.5999	-439	-360	62.2	10.2	32.3	-1620	-1320	242	40.7	128	0.00149	-0.000258	3.67e-05	6.36e-06	0.00119	-0.000241	3.89e-05
1278.31	1005.16	0.055	2400.9	2604.6	0.73	0.27	1.31	1.22	72.5	2.4009	72.8675	0.822	11.5607	0.9274	3.8967	0.1517	0.5915	1.6669	3.9529	3.411	0.1517	0	-1170	-946	177	30.2	94.7	7.2345	1.71593e+06	6.2345	27.2	2.6046	-451	-369	63.9	10.4	33.2	-1620	-1320	241	40.6	128	0.00148	-0.000257	3.65e-05	6.32e-06	0.00117	-0.000239	3.87e-05
1276.31	1003.16	0.055	2399.4	2608.8	0.72	0.28	1.31	1.22	71.7	2.3994	73.0377	0.8138	11.4982	0.9157	3.8367	0.1533	0.5775	1.6611	3.9192	3.4334	0.1533	0	-1160	-937	175	29.9	93.7	7.2814	1.91161e+06	6.2814	27.9	2.6088	-463	-379	65.6	10.7	34.1	-1620	-1320	241	40.6	128	0.00148	-0.000255	3.63e-05	6.29e-06	0.00115	-0.000237	3.85e-05
1274.31	1001.16	0.055	2397.8	2612.8	0.71	0.29	1.3	1.22	71	2.3978	73.2059	0.806	11.4362	0.9041	3.7772	0.1549	0.564	1.6557	3.8857	3.4553	0.1549	0	-1150	-928	173	29.6	92.6	7.3283	2.12961e+06	6.3283	28.7	2.6128	-474	-388	67.3	11	35	-1620	-1320	241	40.6	128	0.00147	-0.000254	3.61e-05	6.25e-06	0.00113	-0.000235	3.83e-05
1272.31	999.16	0.055	2396.3	2616.4	0.71	0.29	1.3	1.22	70.3	2.3963	73.3721	0.7984	11.3749	0.8926	3.7183	0.1565	0.5509	1.6506	3.8522	3.4769	0.1565	0	-1140	-920	171	29.3	91.7	7.375	2.37137e+06	6.375	29.4	2.6164	-485	-398	68.9	11.2	35.8	-1620	-1320	240	40.6	127	0.00146	-0.000252	3.59e-05	6.22e-06	0.00112	-0.000233	3.81e-05
1270.31	997.16	0.055	2394.8	2619.8	0.7	0.3	1.3	1.22	69.6	2.3948	73.5364	0.7911	11.3142	0.8811	3.66	0.1581	0.5382	1.6458	3.8189	3.498	0.1581	0	-1130	-911	170	29.1	90.7	7.4217	2.64058e+06	6.4217	30.1	2.6198	-496	-407	70.4	11.5	36.6	-1620	-1320	240	40.5	127	0.00145	-0.000251	3.57e-05	6.19e-06	0.0011	-0.000231	3.79e-05
1268.31	995.16	0.055	2393.4	2622.9	0.69	0.31	1.3	1.22	68.9	2.3934	73.6988	0.7841	11.2541	0.8697	3.6023	0.1596	0.5258	1.6413	3.7857	3.5187	0.1596	0	-1120	-903	168	28.8	89.8	7.4682	2.939e+06	6.4682	30.8	2.6229	-506	-415	71.9	11.7	37.4	-1620	-1320	240	40.5	127	0.00144	-0.000249	3.55e-05	6.16e-06	0.00108	-0.000229	3.77e-05
1266.31	993.16	0.055	2391.9	2625.8	0.68	0.32	1.3	1.22	68.3	2.3919	73.8593	0.7774	11.1946	0.8584	3.5452	0.1612	0.5138	1.6371	3.7528	3.539	0.1612	0	-1110	-895	166	28.5	88.8	7.5146	3.27039e+06	6.5146	31.4	2.6258	-517	-424	73.4	12	38.2	-1620	-1320	239	40.5	127	0.00143	-0.000248	3.54e-05	6.12e-06	0.00107	-0.000227	3.75e-05
1264.31	991.16	0.055	2390.5	2628.5	0.68	0.32	1.3	1.21	67.6	2.3905	74.0179	0.7709	11.1356	0.8472	3.4887	0.1627	0.5022	1.6332	3.72	3.559	0.1627	0	-1090	-887	164	28.3	88	7.5608	3.63747e+06	6.5608	32.1	2.6285	-526	-432	74.8	12.2	39	-1620	-1320	239	40.5	127	0.00142	-0.000247	3.52e-05	6.09e-06	0.00105	-0.000226	3.73e-05
1262.31	989.16	0.055	2389.1	2631	0.67	0.33	1.3	1.21	67	2.3891	74.1746	0.7647	11.0772	0.836	3.4329	0.1642	0.4909	1.6295	3.6873	3.5785	0.1642	0	-1080	-880	162	28	87.1	7.607	4.04576e+06	6.607	32.7	2.631	-536	-440	76.2	12.4	39.7	-1620	-1320	239	40.5	127	0.00142	-0.000245	3.5e-05	6.07e-06	0.00104	-0.000224	3.71e-05
1260.31	987.16	0.055	2387.7	2633.4	0.67	0.33	1.3	1.21	66.4	2.3877	74.3294	0.7586	11.0194	0.8249	3.3777	0.1658	0.4799	1.626	3.6549	3.5977	0.1658	0	-1070	-872	161	27.8	86.2	7.6531	4.49883e+06	6.6531	33.3	2.6334	-546	-448	77.6	12.7	40.4	-1620	-1320	238	40.4	127	0.00141	-0.000244	3.49e-05	6.04e-06	0.00103	-0.000222	3.69e-05
1258.31	985.16	0.055	2386.4	2635.6	0.66	0.34	1.3	1.21	65.8	2.3864	74.4824	0.7528	10.9621	0.8139	3.3231	0.1673	0.4692	1.6227	3.6227	3.6165	0.1673	0	-1070	-865	159	27.6	85.4	7.699	5.00035e+06	6.699	33.9	2.6356	-555	-455	78.9	12.9	41.1	-1620	-1320	238	40.4	127	0.0014	-0.000243	3.47e-05	6.01e-06	0.00101	-0.000221	3.67e-05
1256.31	983.16	0.055	2385.1	2637.7	0.65	0.35	1.3	1.21	65.2	2.3851	74.6337	0.7472	10.9053	0.803	3.2691	0.1688	0.4588	1.6197	3.5907	3.635	0.1688	0	-1060	-858	157	27.3	84.6	7.7448	5.55648e+06	6.7448	34.5	2.6377	-564	-463	80.1	13.1	41.8	-1620	-1320	238	40.4	126	0.0014	-0.000242	3.45e-05	5.98e-06	0.000998	-0.000219	3.65e-05
1254.31	981.16	0.055	2383.7	2638.5	0.63	0.37	1.3	1.21	62.4	2.3837	74.6879	0.7406	10.8741	0.7891	3.1919	0.1763	0.449	1.627	3.5507	3.7372	0.1763	0	-1010	-822	151	26.2	81	7.7746	5.95114e+06	6.7746	37.3	2.6385	-608	-500	86.4	14.1	45.1	-1620	-1320	237	40.3	126	0.00137	-0.000234	3.41e-05	5.81e-06	0.000957	-0.00021	3.65e-05
1252.31	979.16	0.055	2382.4	2638.7	0.59	0.41	1.3	1.21	59.3	2.3824	74.7184	0.7347	10.8472	0.7747	3.1106	0.1855	0.4397	1.639	3.509	3.8558	0.1855	0	-961	-781	143	24.9	77	7.8	6.30957e+06	6.8	40.4	2.6387	-658	-541	93.3	15.3	48.8	-1620	-1320	236	40.2	126	0.00135	-0.000226	3.36e-05	5.62e-06	0.000912	-0.0002	3.66e-05
1250.31	977.16	0.055	2381.2	2638.7	0.57	0.43	1.3	1.21	56.4	2.3812	74.746	0.7297	10.8188	0.7603	3.0308	0.1951	0.431	1.6538	3.4676	3.9719	0.1951	0	-913	-743	136	23.7	73.1	7.8244	6.67421e+06	6.8244	43.3	2.6387	-705	-580	99.8	16.4	52.2	-1620	-1320	236	40.1	125	0.00133	-0.000218	3.31e-05	5.43e-06	0.000869	-0.00019	3.67e-05
1248.31	975.16	0.055	2380	2638.6	0.54	0.46	1.3	1.2	53.6	2.38	74.7707	0.7256	10.7887	0.7462	2.9526	0.2051	0.4227	1.6714	3.4267	4.0851	0.2051	0	-868	-707	129	22.5	69.5	7.8476	7.04044e+06	6.8476	46.1	2.6386	-750	-617	106	17.5	55.5	-1620	-1320	235	40	125	0.00131	-0.00021	3.27e-05	5.25e-06	0.000829	-0.000181	3.68e-05
1246.31	973.16	0.055	2378.9	2638.2	0.51	0.49	1.3	1.2	51	2.3789	74.7927	0.7223	10.7565	0.7323	2.8763	0.2157	0.415	1.6918	3.3866	4.1951	0.2157	0	-826	-673	123	21.4	66.1	7.8695	7.40457e+06	6.8695	48.7	2.6382	-792	-652	112	18.5	58.6	-1620	-1330	234	39.9	125	0.00129	-0.000203	3.23e-05	5.08e-06	0.000791	-0.000172	3.69e-05
1244.31	971.16	0.055	2377.9	2637.8	0.49	0.51	1.3	1.2	48.5	2.3779	74.8118	0.7198	10.7219	0.7187	2.8019	0.2268	0.4076	1.7153	3.3475	4.3017	0.2268	0	-785	-640	116	20.4	62.8	7.8901	7.76426e+06	6.8901	51.2	2.6378	-832	-686	117	19.4	61.6	-1620	-1330	234	39.8	124	0.00127	-0.000196	3.19e-05	4.92e-06	0.000754	-0.000164	3.7e-05
1242.31	969.16	0.055	2377	2637.3	0.46	0.54	1.3	1.2	46.1	2.377	74.8283	0.7181	10.6846	0.7054	2.7295	0.2386	0.4007	1.742	3.3097	4.4045	0.2386	0	-746	-609	111	19.4	59.7	7.9092	8.11335e+06	6.9092	53.6	2.6373	-871	-718	123	20.3	64.4	-1620	-1330	233	39.7	124	0.00125	-0.000189	3.15e-05	4.76e-06	0.000719	-0.000156	3.71e-05
1240.31	967.16	0.055	2376.1	2636.7	0.44	0.56	1.3	1.2	43.8	2.3761	74.8421	0.7169	10.6441	0.6924	2.6594	0.2511	0.3942	1.7721	3.2735	4.503	0.2511	0	-709	-578	105	18.4	56.7	7.9266	8.44501e+06	6.9266	55.9	2.6367	-907	-749	128	21.2	67.1	-1620	-1330	233	39.6	124	0.00123	-0.000183	3.11e-05	4.61e-06	0.000685	-0.000148	3.71e-05
1238.31	965.16	0.055	2375.3	2636	0.42	0.58	1.3	1.2	41.6	2.3753	74.8535	0.7164	10.6001	0.6799	2.5916	0.2644	0.3881	1.8057	3.239	4.5969	0.2644	0	-673	-550	99.6	17.5	53.9	7.9422	8.75387e+06	6.9422	58.1	2.636	-943	-779	133	22	69.7	-1620	-1330	232	39.6	124	0.00121	-0.000177	3.07e-05	4.47e-06	0.000652	-0.000141	3.72e-05
1236.31	963.16	0.055	2374.6	2635.3	0.4	0.6	1.29	1.2	39.5	2.3746	74.8623	0.7165	10.552	0.6678	2.5262	0.2786	0.3824	1.8432	3.2067	4.6857	0.2786	0	-638	-522	94.4	16.6	51.1	7.9558	9.03233e+06	6.9558	60.2	2.6353	-977	-807	137	22.9	72.2	-1620	-1330	232	39.5	123	0.0012	-0.000171	3.03e-05	4.33e-06	0.00062	-0.000134	3.73e-05
1234.31	961.16	0.055	2374	2634.5	0.38	0.62	1.29	1.2	37.4	2.374	74.8689	0.7171	10.4995	0.6563	2.4633	0.2937	0.377	1.8847	3.1767	4.7689	0.2937	0	-605	-495	89.4	15.8	48.5	7.9674	9.27684e+06	6.9674	62.3	2.6345	-1010	-834	142	23.6	74.6	-1610	-1330	231	39.4	123	0.00118	-0.000165	3e-05	4.19e-06	0.00059	-0.000127	3.74e-05
1232.31	959.16	0.055	2373.5	2633.7	0.36	0.64	1.29	1.2	35.5	2.3735	74.8732	0.7182	10.4421	0.6453	2.4031	0.3099	0.3721	1.9306	3.1495	4.8461	0.3099	0	-574	-469	84.7	15	45.9	7.9767	9.47764e+06	6.9767	64.2	2.6337	-1040	-861	146	24.4	76.9	-1610	-1330	231	39.3	123	0.00117	-0.00016	2.96e-05	4.06e-06	0.00056	-0.00012	3.75e-05
1230.31	957.16	0.055	2373.1	2632.9	0.34	0.66	1.29	1.2	33.6	2.3731	74.8754	0.7197	10.3794	0.6348	2.3455	0.3273	0.3675	1.9809	3.1254	4.9168	0.3273	0	-543	-444	80.1	14.2	43.5	7.9836	9.62942e+06	6.9836	66.1	2.6329	-1070	-886	150	25.1	79.2	-1610	-1330	230	39.3	123	0.00115	-0.000154	2.93e-05	3.93e-06	0.000532	-0.000114	3.76e-05
1228.31	955.16	0.055	2372.7	2632.1	0.32	0.68	1.29	1.2	31.8	2.3727	74.8757	0.7215	10.3111	0.625	2.2906	0.3459	0.3632	2.036	3.1046	4.9805	0.3459	0	-514	-421	75.7	13.4	41.2	7.988	9.72747e+06	6.988	67.9	2.6321	-1100	-911	154	25.8	81.3	-1610	-1330	230	39.2	122	0.00114	-0.000149	2.9e-05	3.81e-06	0.000504	-0.000107	3.76e-05
1226.31	953.16	0.055	2372.5	2631.3	0.3	0.7	1.29	1.2	30.1	2.3725	74.8742	0.7236	10.2371	0.6158	2.2385	0.3657	0.3593	2.0957	3.0874	5.037	0.3657	0	-486	-398	71.5	12.7	38.9	7.9897	9.76562e+06	6.9897	69.6	2.6313	-1130	-934	158	26.5	83.3	-1610	-1330	229	39.1	122	0.00112	-0.000144	2.86e-05	3.69e-06	0.000478	-0.000102	3.77e-05
1224.31	951.16	0.055	2372.3	2630.5	0.29	0.71	1.29	1.2	28.4	2.3723	74.871	0.7259	10.1573	0.6072	2.1892	0.3868	0.3556	2.1602	3.0739	5.0859	0.3868	0	-459	-376	67.6	12	36.8	7.9889	9.74765e+06	6.9889	71.3	2.6305	-1150	-956	161	27.1	85.2	-1610	-1330	229	39.1	122	0.00111	-0.00014	2.83e-05	3.57e-06	0.000453	-9.6e-05	3.78e-05
1222.31	949.16	0.055	2372.3	2629.8	0.27	0.73	1.29	1.2	26.9	2.3723	74.8663	0.7283	10.0719	0.5993	2.1426	0.4092	0.3523	2.2293	3.0644	5.1271	0.4092	0	-434	-356	63.8	11.3	34.8	7.9855	9.67164e+06	6.9855	72.8	2.6298	-1180	-977	165	27.7	87.1	-1610	-1330	228	39	122	0.00109	-0.000135	2.8e-05	3.47e-06	0.000429	-9.07e-05	3.78e-05
1220.31	947.16	0.055	2372.3	2629.1	0.25	0.75	1.29	1.19	25.4	2.3723	74.8601	0.7308	9.9813	0.592	2.0987	0.4329	0.3492	2.3027	3.0587	5.1608	0.4329	0	-410	-336	60.3	10.7	32.9	7.9797	9.54333e+06	6.9797	74.3	2.6291	-1200	-997	168	28.3	88.8	-1610	-1330	228	39	122	0.00108	-0.000131	2.77e-05	3.37e-06	0.000406	-8.56e-05	3.79e-05
1218.31	945.16	0.055	2372.4	2628.4	0.24	0.76	1.29	1.19	24	2.3724	74.8526	0.7332	9.886	0.5853	2.0573	0.4576	0.3464	2.38	3.0567	5.1872	0.4576	0	-387	-318	57	10.1	31.1	7.9715	9.36483e+06	6.9715	75.7	2.6284	-1220	-1020	171	28.8	90.4	-1610	-1330	228	38.9	122	0.00107	-0.000127	2.75e-05	3.27e-06	0.000384	-8.09e-05	3.79e-05
1216.31	943.16	0.055	2372.6	2627.7	0.23	0.77	1.29	1.19	22.8	2.3726	74.8437	0.7356	9.7867	0.5792	2.0182	0.4834	0.3438	2.4609	3.0584	5.2066	0.4834	0	-367	-301	53.9	9.59	29.4	7.9613	9.14745e+06	6.9613	77	2.6277	-1240	-1030	173	29.3	91.9	-1610	-1330	227	38.9	121	0.00106	-0.000124	2.72e-05	3.18e-06	0.000364	-7.65e-05	3.8e-05
1214.31	941.16	0.055	2372.8	2627.2	0.22	0.78	1.29	1.19	21.6	2.3728	74.8336	0.7378	9.6842	0.5736	1.9814	0.5102	0.3413	2.5449	3.0633	5.2195	0.5102	0	-347	-285	51	9.09	27.9	7.9493	8.89816e+06	6.9493	78.2	2.6272	-1260	-1050	176	29.8	93.3	-1610	-1330	227	38.8	121	0.00105	-0.00012	2.7e-05	3.1e-06	0.000346	-7.24e-05	3.8e-05
1212.31	939.16	0.055	2373.1	2626.6	0.21	0.79	1.29	1.19	20.5	2.3731	74.8223	0.7399	9.5793	0.5684	1.9465	0.5377	0.339	2.6315	3.0711	5.2266	0.5377	0	-329	-271	48.4	8.62	26.5	7.9357	8.62383e+06	6.9357	79.3	2.6266	-1280	-1060	178	30.2	94.6	-1610	-1340	227	38.8	121	0.00104	-0.000117	2.67e-05	3.02e-06	0.000328	-6.86e-05	3.81e-05
1210.31	937.16	0.055	2373.5	2626.1	0.19	0.81	1.29	1.19	19.4	2.3735	74.8097	0.7418	9.4727	0.5637	1.9135	0.5658	0.3368	2.7202	3.0815	5.2284	0.5658	0	-313	-257	45.9	8.19	25.2	7.9209	8.33489e+06	6.9209	80.3	2.6261	-1300	-1080	180	30.6	95.8	-1610	-1340	226	38.8	121	0.00103	-0.000114	2.65e-05	2.95e-06	0.000312	-6.51e-05	3.81e-05
1208.31	935.16	0.055	2373.9	2625.7	0.19	0.81	1.29	1.19	18.5	2.3739	74.7959	0.7435	9.3651	0.5593	1.8821	0.5946	0.3347	2.8107	3.0941	5.2256	0.5946	0	-298	-245	43.6	7.79	24	7.905	8.03526e+06	6.905	81.2	2.6257	-1310	-1090	182	30.9	96.9	-1610	-1340	226	38.7	121	0.00102	-0.000112	2.63e-05	2.88e-06	0.000297	-6.19e-05	3.81e-05
1206.31	933.16	0.055	2374.4	2625.3	0.18	0.82	1.29	1.19	17.6	2.3744	74.7808	0.745	9.2571	0.5551	1.8521	0.6237	0.3327	2.9025	3.1085	5.2188	0.6237	0	-284	-233	41.6	7.43	22.8	7.8882	7.73036e+06	6.8882	82.1	2.6253	-1330	-1100	184	31.3	97.9	-1610	-1340	226	38.7	121	0.00101	-0.000109	2.61e-05	2.82e-06	0.000283	-5.89e-05	3.81e-05
1204.31	931.16	0.055	2374.9	2624.9	0.17	0.83	1.3	1.19	16.8	2.3749	74.7643	0.7463	9.1493	0.5513	1.8233	0.6533	0.3307	2.9954	3.1244	5.2084	0.6533	0	-271	-223	39.7	7.09	21.8	7.8708	7.42677e+06	6.8708	82.9	2.6249	-1340	-1110	186	31.6	98.8	-1610	-1340	225	38.7	121	0.001	-0.000107	2.6e-05	2.76e-06	0.000271	-5.61e-05	3.82e-05
1202.31	929.16	0.055	2375.4	2624.6	0.16	0.84	1.3	1.19	16.1	2.3754	74.7464	0.7474	9.042	0.5476	1.7957	0.6832	0.3288	3.0891	3.1415	5.195	0.6832	0	-259	-213	37.9	6.78	20.9	7.853	7.12853e+06	6.853	83.6	2.6246	-1350	-1120	187	31.9	99.6	-1610	-1340	225	38.6	120	0.000997	-0.000105	2.58e-05	2.71e-06	0.000259	-5.36e-05	3.82e-05
1200.31	927.16	0.055	2375.9	2624.3	0.15	0.85	1.3	1.19	15.4	2.3759	74.727	0.7484	8.9357	0.5441	1.7691	0.7133	0.3269	3.1835	3.1595	5.1791	0.7133	0	-248	-204	36.3	6.49	20	7.8347	6.83439e+06	6.8347	84.3	2.6243	-1360	-1130	188	32.1	100	-1610	-1340	225	38.6	120	0.000991	-0.000103	2.57e-05	2.66e-06	0.000248	-5.12e-05	3.82e-05
1198.31	925.16	0.055	2376.5	2624.1	0.15	0.85	1.3	1.19	14.8	2.3765	74.7061	0.7493	8.8305	0.5408	1.7434	0.7437	0.325	3.2784	3.1782	5.1609	0.7437	0	-237	-196	34.7	6.22	19.2	7.8162	6.54938e+06	6.8162	84.9	2.6241	-1370	-1140	190	32.4	101	-1610	-1340	224	38.6	120	0.000985	-0.000101	2.55e-05	2.62e-06	0.000238	-4.91e-05	3.82e-05
1196.31	923.16	0.055	2377.1	2623.8	0.14	0.86	1.3	1.19	14.2	2.3771	74.6836	0.75	8.7267	0.5376	1.7185	0.7743	0.3231	3.3737	3.1974	5.1408	0.7743	0	-228	-188	33.3	5.98	18.4	7.7975	6.27336e+06	6.7975	85.5	2.6238	-1380	-1150	191	32.6	102	-1610	-1340	224	38.6	120	0.000979	-9.93e-05	2.54e-05	2.57e-06	0.000229	-4.7e-05	3.82e-05
1194.31	921.16	0.055	2377.8	2623.6	0.14	0.86	1.3	1.19	13.7	2.3778	74.6595	0.7506	8.6243	0.5345	1.6942	0.8052	0.3213	3.4692	3.2169	5.1191	0.8052	0	-219	-181	32	5.75	17.7	7.7787	6.00759e+06	6.7787	86.1	2.6236	-1390	-1160	192	32.8	102	-1610	-1340	224	38.6	120	0.000974	-9.77e-05	2.53e-05	2.53e-06	0.00022	-4.52e-05	3.82e-05
1192.31	919.16	0.055	2378.4	2623.4	0.13	0.87	1.3	1.19	13.2	2.3784	74.6335	0.7512	8.5237	0.5314	1.6706	0.8363	0.3194	3.5651	3.2366	5.096	0.8363	0	-211	-174	30.8	5.53	17.1	7.7597	5.75043e+06	6.7597	86.6	2.6234	-1390	-1160	193	33	103	-1610	-1340	224	38.5	120	0.000969	-9.63e-05	2.52e-05	2.5e-06	0.000212	-4.34e-05	3.83e-05
1190.31	917.16	0.055	2379.1	2623.3	0.13	0.87	1.3	1.19	12.7	2.3791	74.6056	0.7517	8.4247	0.5285	1.6476	0.8677	0.3176	3.6612	3.2562	5.0718	0.8677	0	-203	-168	29.7	5.33	16.4	7.7407	5.50427e+06	6.7407	87.1	2.6233	-1400	-1170	194	33.2	104	-1610	-1340	223	38.5	120	0.000965	-9.49e-05	2.5e-05	2.46e-06	0.000204	-4.18e-05	3.83e-05
1188.31	915.16	0.055	2379.8	2623.1	0.12	0.88	1.3	1.19	12.2	2.3798	74.5756	0.7521	8.3274	0.5255	1.625	0.8994	0.3157	3.7575	3.2757	5.0465	0.8994	0	-196	-162	28.6	5.14	15.9	7.7215	5.26623e+06	6.7215	87.5	2.6231	-1410	-1180	194	33.4	104	-1600	-1340	223	38.5	120	0.00096	-9.36e-05	2.49e-05	2.43e-06	0.000197	-4.02e-05	3.83e-05
1186.31	913.16	0.055	2380.6	2623	0.12	0.88	1.3	1.19	11.8	2.3806	74.5435	0.7525	8.2319	0.5227	1.603	0.9315	0.3138	3.8542	3.295	5.0204	0.9315	0	-189	-156	27.6	4.96	15.3	7.7023	5.03849e+06	6.7023	87.9	2.623	-1420	-1180	195	33.5	105	-1600	-1340	223	38.5	120	0.000956	-9.24e-05	2.48e-05	2.4e-06	0.00019	-3.88e-05	3.83e-05
1184.31	911.16	0.055	2381.3	2622.9	0.11	0.89	1.3	1.19	11.4	2.3813	74.5089	0.7529	8.1382	0.5198	1.5814	0.9641	0.312	3.9511	3.314	4.9936	0.9641	0	-183	-151	26.6	4.79	14.8	7.6828	4.81726e+06	6.6828	88.3	2.6229	-1420	-1190	196	33.7	105	-1600	-1340	223	38.5	120	0.000952	-9.13e-05	2.48e-05	2.37e-06	0.000183	-3.74e-05	3.83e-05
1182.31	909.16	0.055	2382.1	2622.8	0.11	0.89	1.3	1.19	11	2.3821	74.472	0.7533	8.0456	0.517	1.5603	0.9973	0.3101	4.0485	3.3331	4.9656	0.9973	0	-176	-146	25.7	4.63	14.3	7.663	4.60257e+06	6.663	88.7	2.6228	-1430	-1190	197	33.8	105	-1600	-1340	222	38.5	120	0.000949	-9.02e-05	2.47e-05	2.35e-06	0.000177	-3.61e-05	3.83e-05
1180.31	907.16	0.055	2383	2622.7	0.11	0.89	1.3	1.19	10.6	2.383	74.438	0.7529	7.939	0.5153	1.5418	1.0338	0.3085	4.1479	3.365	4.924	1.0338	0	-170	-141	24.8	4.47	13.8	7.6375	4.3401e+06	6.6375	89.1	2.6227	-1430	-1200	197	34	106	-1600	-1340	222	38.4	120	0.000945	-8.91e-05	2.46e-05	2.32e-06	0.000171	-3.47e-05	3.83e-05
1178.31	905.16	0.055	2383.8	2622.6	0.1	0.9	1.3	1.19	10.3	2.3838	74.401	0.7524	7.8351	0.5135	1.5236	1.0708	0.3069	4.2471	3.396	4.8827	1.0708	0	-164	-136	23.9	4.31	13.3	7.6119	4.09166e+06	6.6119	89.5	2.6226	-1440	-1210	198	34.1	106	-1600	-1340	222	38.4	120	0.000941	-8.81e-05	2.45e-05	2.29e-06	0.000165	-3.35e-05	3.83e-05
1176.31	903.16	0.055	2384.7	2622.5	0.1	0.9	1.3	1.19	9.92	2.3847	74.3605	0.7519	7.7338	0.5116	1.5055	1.1087	0.3053	4.3463	3.426	4.8417	1.1087	0	-158	-131	23.1	4.16	12.9	7.5862	3.85656e+06	6.5862	89.8	2.6225	-1440	-1210	198	34.2	107	-1600	-1340	222	38.4	120	0.000938	-8.71e-05	2.44e-05	2.27e-06	0.000159	-3.23e-05	3.83e-05
1174.31	901.16	0.055	2385.6	2622.4	0.1	0.9	1.3	1.19	9.59	2.3856	74.316	0.7515	7.6351	0.5098	1.4876	1.1476	0.3036	4.4457	3.4548	4.8009	1.1476	0	-153	-127	22.3	4.02	12.5	7.5601	3.63162e+06	6.5601	90.1	2.6224	-1450	-1210	199	34.4	107	-1600	-1340	221	38.4	120	0.000934	-8.61e-05	2.43e-05	2.24e-06	0.000154	-3.11e-05	3.83e-05
1172.31	899.16	0.055	2386.6	2622.3	0.09	0.91	1.3	1.19	9.26	2.3866	74.2667	0.7512	7.5388	0.5078	1.4699	1.1877	0.3019	4.5455	3.4824	4.7604	1.1877	0	-148	-122	21.5	3.88	12	7.5335	3.41586e+06	6.5335	90.5	2.6223	-1450	-1220	199	34.5	107	-1600	-1340	221	38.4	119	0.000931	-8.52e-05	2.43e-05	2.22e-06	0.000148	-3e-05	3.83e-05
1170.31	897.16	0.055	2386.8	2622.7	0.09	0.91	1.3	1.19	8.71	2.3868	74.2603	0.6778	7.3834	0.5253	1.5027	1.1465	0.2867	4.7028	3.5604	4.6908	1.2634	0	-139	-115	20.2	3.65	11.3	7.5131	3.25912e+06	6.5131	91	2.6227	-1460	-1230	200	34.7	108	-1600	-1340	221	38.4	119	0.000927	-8.37e-05	2.42e-05	2.18e-06	0.000139	-2.81e-05	3.81e-05
1168.31	895.16	0.055	2387.7	2622.7	0.08	0.92	1.3	1.19	8.36	2.3877	74.2006	0.6682	7.2845	0.5258	1.4909	1.1763	0.2832	4.8153	3.592	4.6474	1.3159	0	-133	-111	19.4	3.5	10.9	7.4856	3.05914e+06	6.4856	91.4	2.6227	-1470	-1230	201	34.8	108	-1600	-1340	220	38.3	119	0.000924	-8.27e-05	2.41e-05	2.16e-06	0.000133	-2.69e-05	3.81e-05
1166.31	893.16	0.055	2388.7	2622.7	0.08	0.92	1.3	1.19	8.01	2.3887	74.1283	0.6588	7.1882	0.5262	1.4789	1.2087	0.2797	4.9315	3.6214	4.6043	1.3739	0	-127	-106	18.5	3.35	10.4	7.4557	2.85562e+06	6.4557	91.7	2.6227	-1470	-1240	202	35	109	-1600	-1340	220	38.3	119	0.000921	-8.17e-05	2.4e-05	2.13e-06	0.000127	-2.57e-05	3.8e-05
1164.31	891.16	0.055	2389.9	2622.7	0.08	0.92	1.3	1.19	7.64	2.3899	74.0372	0.6494	7.0949	0.5265	1.467	1.2454	0.2763	5.0537	3.6476	4.5617	1.4403	0	-122	-101	17.7	3.2	9.94	7.422	2.64241e+06	6.422	92.1	2.6227	-1480	-1240	202	35.1	109	-1600	-1340	220	38.3	119	0.000918	-8.07e-05	2.4e-05	2.11e-06	0.000121	-2.45e-05	3.8e-05
1162.31	889.16	0.055	2391.3	2622.7	0.07	0.93	1.3	1.19	7.23	2.3913	73.9148	0.64	7.0049	0.5269	1.4551	1.2899	0.2731	5.1864	3.6687	4.5194	1.5208	0	-115	-95.6	16.7	3.02	9.42	7.3814	2.40658e+06	6.3814	92.5	2.6227	-1480	-1250	203	35.3	110	-1600	-1340	220	38.3	119	0.000914	-7.96e-05	2.39e-05	2.08e-06	0.000115	-2.31e-05	3.79e-05
1160.31	887.16	0.055	2392.6	2622.8	0.07	0.93	1.3	1.19	6.59	2.3926	73.8645	0.6274	6.9176	0.5291	1.4518	1.3726	0.2693	5.2496	3.6993	4.4712	1.5476	0	-105	-87.1	15.2	2.76	8.59	7.3431	2.20343e+06	6.3431	93.1	2.6228	-1490	-1260	204	35.5	110	-1600	-1340	219	38.3	119	0.000909	-7.79e-05	2.37e-05	2.03e-06	0.000105	-2.1e-05	3.79e-05
1158.31	885.16	0.055	2428.4	2621.9	0.02	0.98	1.3	1.18	1.8	2.4284	71.5203	0.5777	7.351	0.5684	1.6436	3.5272	0.381	5.0719	3.064	4.3726	1.9224	0	-28.2	-23.4	4.14	0.741	2.35	6.5038	319007	5.5038	98	2.6219	-1570	-1320	214	37.4	116	-1600	-1350	218	38.1	118	0.00087	-6.52e-05	2.28e-05	1.71e-06	2.84e-05	-5.62e-06	3.83e-05
1156.31	883.16	0.055	2435.8	2622	0.01	0.99	1.31	1.18	1.49	2.4358	71.0479	0.5726	7.3519	0.5736	1.6614	3.933	0.3976	5.1515	2.9683	4.3221	2.0201	0	-23.3	-19.3	3.41	0.611	1.94	6.3513	224543	5.3513	98.3	2.622	-1570	-1330	215	37.5	116	-1600	-1350	218	38.1	118	0.000867	-6.44e-05	2.28e-05	1.69e-06	2.34e-05	-4.61e-06	3.84e-05
AVERAGE			2392.77	2603.66			1.30618	1.20843
[truncated: 1 more columns]
