# Supplementary material for: Magma Dynamics and Cooling in Sub-volcanic intrusions: Insights on eruption potential from Finite Element Modeling
Source: Research Square preprint supplement (doi:10.21203/rs.3.rs-8173420/v1), 2025-12-04
Supplement: Supplementary file 2 [file 38e0f8affc445f3a6be2a10e.pdf]

# **Magma Dynamics and Cooling in Sub-volcanic intrusions: Insights on eruption potential from Finite Element Modeling**

Erika Ronchin<sup>1,2</sup>, Adelina Geyer Traver<sup>3</sup>, Steffi Burchardt<sup>4,5</sup>, Christoph Hieronymus<sup>4</sup>, Tobias Mattsson<sup>4</sup>

<sup>1</sup> Department of Earth Sciences, Sapienza University of Rome, Rome, Italy.

<sup>2</sup> CREA Research Centre for Viticulture and Enology, Gorizia, Italy

<sup>3</sup> GEO3BCN, CSIC, Lluís Solé i Sabarís s/n, 08028 Barcelona

<sup>4</sup> Department of Earth Sciences, Uppsala University, Uppsala, Sweden

<sup>5</sup> Centre for Natural Hazards and Disaster Science, Sweden

Corresponding author: [steffi.burchardt@geo.uu.se](mailto:steffi.burchardt@geo.uu.se)

## **SUPPLEMENTARY INFORMATION**

### **TABLE 4**

Table listing the performed models with a link to a video of the simulation showing the sub-volcanic intrusion growing (only for the ‘intruded’ models) and post-growth phase (all models). Gray color indicates the host rock domain and magma is illustrated with a color scale representing the  $\log_{10}$  (effective viscosity) (Pa s) as calculated in Supplementary Information Table 3. Magma influx velocity ( $v_{\text{influx}}$ ) and the times at which the sub-volcanic intrusion reaches the maximum thickness of 200 m ( $t_{200\text{m}}$ ) are also indicated. Years in the last two columns are approximated to the nearest integer.

| <b>Model</b>                   | <b><math>v_{\text{influx}}</math> [m<br/>s<sup>-1</sup>]</b> | <b><math>t_{200m}</math> [sec,<br/>years]</b> | <b>Video</b>                                                                                  |
|--------------------------------|--------------------------------------------------------------|-----------------------------------------------|-----------------------------------------------------------------------------------------------|
| <i>instant_<br/>conduction</i> | 0                                                            | 0                                             | <a href="https://doi.org/10.5281/zenodo.17296793">https://doi.org/10.5281/zenodo.17296793</a> |
| <i>instant_<br/>convection</i> | 0                                                            | 0                                             | <a href="https://doi.org/10.5281/zenodo.17296882">https://doi.org/10.5281/zenodo.17296882</a> |
| <i>intruded_<br/>1month</i>    | $1 \times 10^{-2}$                                           | $3.98 \times 10^6$ ,<br>0.13                  | <a href="https://doi.org/10.5281/zenodo.17296931">https://doi.org/10.5281/zenodo.17296931</a> |
| <i>intruded_<br/>1year</i>     | $1 \times 10^{-3}$                                           | $4 \times 10^7$ , 1.3                         | <a href="https://doi.org/10.5281/zenodo.17296952">https://doi.org/10.5281/zenodo.17296952</a> |
| <i>intruded_<br/>12years</i>   | $1 \times 10^{-4}$                                           | $4 \times 10^8$ ,<br>12.7                     | <a href="https://doi.org/10.5281/zenodo.17296977">https://doi.org/10.5281/zenodo.17296977</a> |
| <i>intruded_<br/>25years</i>   | $5 \times 10^{-5}$                                           | $7.99 \times 10^8$ ,<br>25.3                  | <a href="https://doi.org/10.5281/zenodo.17297055">https://doi.org/10.5281/zenodo.17297055</a> |
| <i>intruded_<br/>127years</i>  | $1 \times 10^{-5}$                                           | $4.00 \times 10^9$ ,<br>126.8                 | <a href="https://doi.org/10.5281/zenodo.17297002">https://doi.org/10.5281/zenodo.17297002</a> |
