# Supplementary material for: Magma Dynamics and Cooling in Sub-volcanic intrusions: Insights on eruption potential from Finite Element Modeling
Source: Research Square preprint supplement (doi:10.21203/rs.3.rs-8173420/v1), 2025-12-04
Supplement: Supplementary file 2 [file d0e46a3ff6113b1ff0dde955.xlsx]

## Sheet: Viscosity
T(K)	melt fraction (θ)	solid fraction (ϕ)	liq_visc (MELTS result) (Pa s)	final viscosity (Pa s)
1358.31	1	0	207730	208000
1356.31	0.99	0.01	216770	226000
1354.31	0.98	0.02	226204	246000
1352.31	0.98	0.02	235993	257000
1350.31	0.97	0.03	246207	280000
1348.31	0.96	0.04	256803	305000
1346.31	0.95	0.05	267793	333000
1344.31	0.95	0.05	279254	347000
1342.31	0.94	0.06	291139	379000
1340.31	0.93	0.07	303529	414000
1338.31	0.92	0.08	316446	453000
1336.31	0.92	0.08	329837	472000
1334.31	0.91	0.09	343716	516000
1332.31	0.9	0.1	358179	565000
1330.31	0.9	0.1	373250	589000
1328.31	0.89	0.11	388866	645000
1326.31	0.88	0.12	405135	708000
1324.31	0.88	0.12	422085	737000
1322.31	0.87	0.13	439643	810000
1320.31	0.87	0.13	457931	843000
1318.31	0.86	0.14	476980	927000
1316.31	0.85	0.15	496707	1020000
1314.31	0.85	0.15	517249	1060000
1312.31	0.84	0.16	538642	1170000
1310.31	0.84	0.16	560919	1220000
1308.31	0.83	0.17	583983	1340000
1306.31	0.82	0.18	607995	1480000
1304.31	0.82	0.18	632995	1540000
1302.31	0.81	0.19	659022	1710000
1300.31	0.81	0.19	685962	1780000
1298.31	0.8	0.2	714167	1970000
1296.31	0.8	0.2	743361	2050000
1294.31	0.79	0.21	773927	2270000
1292.31	0.79	0.21	805564	2360000
1290.31	0.78	0.22	838494	2630000
1288.31	0.78	0.22	872770	2730000
1286.31	0.76	0.24	986052	3540000
1284.31	0.76	0.24	1.06096e+06	3800000
1282.31	0.74	0.26	1.38102e+06	5710000
1280.31	0.74	0.26	1.53957e+06	6370000
1278.31	0.73	0.27	1.71593e+06	7650000
1276.31	0.72	0.28	1.91161e+06	9200000
1274.31	0.71	0.29	2.12961e+06	11100000
1272.31	0.71	0.29	2.37137e+06	12400000
1270.31	0.7	0.3	2.64058e+06	14900000
1268.31	0.69	0.31	2.939e+06	15000000
1266.31	0.68	0.32	3.27039e+06	15200000			Viscosity according to Scaillet et al. 1998
1264.31	0.68	0.32	3.63747e+06	15500000
1262.31	0.67	0.33	4.04576e+06	16000000			Viscosity according to Bea (2010)
1260.31	0.67	0.33	4.49883e+06	16500000
1258.31	0.66	0.34	5.00035e+06	19600000
1256.31	0.65	0.35	5.55648e+06	23400000
1254.31	0.63	0.37	5.95114e+06	29000000
1252.31	0.59	0.41	6.30957e+06	43300000
1250.31	0.57	0.43	6.67421e+06	56000000
1248.31	0.54	0.46	7.04044e+06	84500000
1246.31	0.51	0.49	7.40457e+06	140000000
1244.31	0.49	0.51	7.76426e+06	214000000
1242.31	0.46	0.54	8.11335e+06	487000000
1240.31	0.44	0.56	8.44501e+06	1120000000
1238.31	0.42	0.58	8.75387e+06	4530000000
1236.31	0.4	0.6	9.03233e+06	5400000000
1226.31	0.3	0.7	9.76562e+06	7000000000
1218.31	0.24	0.76	9.36483e+06	10000000000
1210.31	0.19	0.81	8.33489e+06	20000000000
1200.31	0.15	0.85	6.83439e+06	70000000000
1178.31	0.1	0.9	4.09166e+06	400000000000
1174.31	0.1	0.9	3.63162e+06	450000000000
1170.31	0.09	0.91	3.25912e+06	500000000000
1160.31	0.07	0.93	2.20343e+06	600000000000
1156.31	0.01	0.99	224543	800000000000
